# Supplementary material
Source: publisher figshare collection journal article supplement (https://gsajournals.figshare.com/ndownloader/files/11309417)
Supplement: Supplementary file 1 [file 11309417]

**Table S2. Overview of ploidy and colony phenotype for all isolates.**

| **Strain** | **mouse** | **selection** | **Colony** | **Ploidy** | **YSEQ** |
| --- | --- | --- | --- | --- | --- |
| **ID** | **ID** |  | **phenotype** |  | **number** |
| O1A1 | D1M1 | 2DOG | 00 | 1.95 | 197 |
| O1A10 | D2M1 | 2DOG | 00 | 1.90 | 195 |
| O1A11 | D2M1 | 2DOG | 02 | 1.91 | 195 |
| O1A12 | D2M1 | 2DOG | 00 | 1.89 | 195 |
| O1A2 | D1M1 | 2DOG | 10 | 2.13 | 197 |
| O1A3 | D1M1 | 2DOG | 12 | 3.81 | 182 |
| O1A4 | D1M1 | 2DOG | 12 | 1.96 | 195 |
| O1A5 | D1M1 | 2DOG | 11 | 2.43 | 182 |
| O1A6 | D1M1 | 2DOG | 02 | 1.92 | 197 |
| O1A7 | D2M1 | 2DOG | 00 | 1.97 | 182 |
| O1A8 | D2M1 | 2DOG | 02 | 1.31 | 182 |
| O1A9 | D2M1 | 2DOG | 00 | 1.90 | 197 |
| O1B1 | D2M3 | 2DOG | 00 | 1.91 | 197 |
| O1B10 | D2M3 | 2DOG | 11 | 1.85 | 195 |
| O1B11 | D2M3 | 2DOG | 12 | 2.01 | 195 |
| O1B12 | D2M5 | 2DOG | 10 | 1.84 | 203 |
| O1B2 | D2M3 | 2DOG | 00 | 1.89 | 197 |
| O1B3 | D2M3 | 2DOG | 00 | 1.81 | 203 |
| O1B4 | D2M3 | 2DOG | 00 | 1.86 | 195 |
| O1B5 | D2M3 | 2DOG | 00 | 1.83 | 195 |
| O1B6 | D2M3 | 2DOG | 01 | 1.93 | 195 |
| O1B7 | D2M3 | 2DOG | 00 | 1.87 | 195 |
| O1B8 | D2M3 | 2DOG | 12 | 3.70 | 182 |
| O1B9 | D2M3 | 2DOG | 12 | 1.98 | 197 |
| O1C1 | D2M5 | 2DOG | 00 | 1.82 | 182 |
| O1C10 | D3M1 | 2DOG | 12 | 1.96 | 197 |
| O1C11 | D3M1 | 2DOG | 20 | 2.09 | 197 |
| O1C12 | D3M1 | 2DOG | 00 | 2.00 | 197 |
| O1C2 | D2M5 | 2DOG | 10 | 1.90 | 197 |
| O1C3 | D2M5 | 2DOG | 20 | 1.80 | 203 |
| O1C4 | D2M5 | 2DOG | 20 | 1.81 | 195 |
| O1C5 | D2M5 | 2DOG | 01 | 1.88 | 197 |
| O1C6 | D2M5 | 2DOG | 00 | 1.88 | 197 |
| O1C7 | D3M1 | 2DOG | 12 | 0.94 | 195 |
| O1C8 | D3M1 | 2DOG | 01 | 0.94 | 182 |
| O1C9 | D3M1 | 2DOG | 12 | 1.95 | 197 |
| O1D1 | D3M1 | 2DOG | 03 | 1.91 | 197 |
| O1D10 | D3M1 | 2DOG | 12 | 1.90 | 195 |
| O1D11 | D3M1 | 2DOG | 03 | 1.78 | 182 |
| O1D12 | D3M1 | 2DOG | 00 | 1.94 | 197 |
| O1D2 | D3M1 | 2DOG | 00 | 2.04 | 197 |
| O1D3 | D3M1 | 2DOG | 11 | 2.03 | 197 |
| O1D4 | D3M1 | 2DOG | 01 | 2.01 | 197 |
| O1D5 | D3M1 | 2DOG | 01 | 2.02 | 197 |
| O1D6 | D3M1 | 2DOG | 13 | 3.76 | 182 |
| O1D7 | D3M1 | 2DOG | 11 | 3.94 | 182 |
| O1D8 | D3M1 | 2DOG | 13 | 3.98 | 182 |
| O1D9 | D3M1 | 2DOG | 20 | 1.91 | 197 |
| O1E1 | D3M1 | 2DOG | 12 | 1.95 | 195 |
| O1E10 | D3M2 | 2DOG | 12 | 1.94 | 197 |
| O1E11 | D3M2 | 2DOG | 12 | 2.18 | 182 |
| O1E12 | D3M2 | 2DOG | 11 | 2.16 | 182 |
| O1E2 | D3M1 | 2DOG | 10 | 1.93 | 197 |
| O1E3 | D3M1 | 2DOG | 03 | 2.00 | 195 |
| O1E4 | D3M1 | 2DOG | 20 | 1.93 | 195 |
| O1E5 | D3M1 | 2DOG | 12 | 2.19 | 197 |
| O1E6 | D3M1 | 2DOG | 11 | 2.00 | 195 |
| O1E7 | D3M2 | 2DOG | 00 | 1.96 | 197 |
| O1E8 | D3M2 | 2DOG | 01 | 2.07 | 197 |
| O1E9 | D3M2 | 2DOG | 12 | 4.15 | 182 |
| O1F1 | D3M2 | 2DOG | 12 | 1.85 | 195 |
| O1F10 | D3M2 | 2DOG | 10 | 2.13 | 197 |
| O1F11 | D3M2 | 2DOG | 12 | 1.91 | 195 |
| O1F12 | D3M2 | 2DOG | 10 | 1.99 | 197 |
| O1F2 | D3M2 | 2DOG | 00 | 2.01 | 197 |
| O1F3 | D3M2 | 2DOG | 00 | 1.95 | 197 |
| O1F4 | D3M2 | 2DOG | 10 | 1.07 | 182 |
| O1F5 | D3M2 | 2DOG | 12 | nd | 182 |
| O1F6 | D3M2 | 2DOG | 00 | 2.02 | 197 |
| O1F7 | D3M2 | 2DOG | 01 | 2.03 | 197 |
| O1F8 | D3M2 | 2DOG | 12 | 4.00 | 182 |
| O1F9 | D3M2 | 2DOG | 20 | 1.87 | 197 |
| O1G1 | D3M2 | 2DOG | 12 | 2.00 | 195 |
| O1G10 | D3M3 | 2DOG | 12 | 2.12 | 182 |
| O1G11 | D3M3 | 2DOG | 00 | 1.92 | 195 |
| O1G12 | D3M3 | 2DOG | 12 | 1.99 | 197 |
| O1G2 | D3M2 | 2DOG | 20 | 1.99 | 197 |
| O1G3 | D3M2 | 2DOG | 12 | 2.03 | 197 |
| O1G4 | D3M2 | 2DOG | 12 | 1.93 | 197 |
| O1G5 | D3M2 | 2DOG | 01 | 2.07 | 197 |
| O1G6 | D3M2 | 2DOG | 00 | 2.02 | 195 |
| O1G7 | D3M3 | 2DOG | 20 | 2.01 | 195 |
| O1G8 | D3M3 | 2DOG | 10 | 2.01 | 197 |
| O1G9 | D3M3 | 2DOG | 00 | 1.89 | 197 |
| O1H1 | D3M3 | 2DOG | 11 | 2.02 | 195 |
| O1H2 | D3M3 | 2DOG | 02 | 2.03 | 197 |
| O1H3 | D3M3 | 2DOG | 01 | 2.09 | 197 |
| O1H4 | D3M3 | 2DOG | 00 | 2.00 | 197 |
| O1H5 | D3M3 | 2DOG | 12 | 2.03 | 197 |
| O1H6 | D3M3 | 2DOG | 12 | 1.94 | 197 |
| O2A1 | D3M3 | 2DOG | 12 | 2.24 | 182 |
| O2A10 | D3M5 | 2DOG | 01 | 1.97 | 195 |
| O2A12 | D3M5 | 2DOG | 00 | 1.96 | 197 |
| O2A2 | D3M3 | 2DOG | 00 | 2.05 | 197 |
| O2A3 | D3M4 | 2DOG | 11 | 2.34 | 195 |
| O2A4 | D3M4 | 2DOG | 11 | 0.97 | 182 |
| O2A5 | D3M5 | 2DOG | 00 | 2.00 | 197 |
| O2A6 | D3M5 | 2DOG | 00 | 2.06 | 195 |
| O2A7 | D3M5 | 2DOG | 00 | 1.98 | 195 |
| O2A8 | D3M5 | 2DOG | 00 | 2.07 | 195 |
| O2A9 | D3M5 | 2DOG | 11 | 2.12 | 195 |
| O2B1 | D3M5 | 2DOG | 00 | 2.02 | 197 |
| O2B10 | D3M5 | 2DOG | 00 | 2.02 | 197 |
| O2B11 | D3M5 | 2DOG | 00 | 2.11 | 197 |
| O2B12 | D3M5 | 2DOG | 00 | 1.98 | 197 |
| O2B2 | D3M5 | 2DOG | 12 | 1.92 | 195 |
| O2B3 | D3M5 | 2DOG | 12 | 2.05 | 182 |
| O2B4 | D3M5 | 2DOG | 00 | 2.02 | 197 |
| O2B5 | D3M5 | 2DOG | 00 | 1.91 | 195 |
| O2B6 | D3M5 | 2DOG | 00 | 2.02 | 195 |
| O2B7 | D3M5 | 2DOG | 00 | 2.01 | 195 |
| O2B8 | D3M5 | 2DOG | 00 | 2.02 | 195 |
| O2B9 | D3M5 | 2DOG | 00 | 2.02 | 197 |
| O2C1 | D3M5 | 2DOG | 00 | 2.05 | 197 |
| O2C10 | D3M5 | 2DOG | 13 | 1.90 | 195 |
| O2C11 | D5M1 | 2DOG | 00 | 1.95 | 197 |
| O2C12 | D5M1 | 2DOG | 00 | 1.92 | 197 |
| O2C2 | D3M5 | 2DOG | 00 | 1.99 | 195 |
| O2C3 | D3M5 | 2DOG | 00 | 1.98 | 195 |
| O2C4 | D3M5 | 2DOG | 02 | 2.03 | 197 |
| O2C5 | D3M5 | 2DOG | 10 | 1.96 | 197 |
| O2C6 | D3M5 | 2DOG | 02 | 2.01 | 197 |
| O2C7 | D3M5 | 2DOG | 02 | 2.04 | 197 |
| O2C8 | D3M5 | 2DOG | 11 | 1.31 | 182 |
| O2C9 | D3M5 | 2DOG | 12 | 2.19 | 195 |
| O2D1 | D5M1 | 2DOG | 12 | 1.91 | 197 |
| O2D10 | D5M2 | 2DOG | 12 | 2.13 | 197 |
| O2D11 | D5M2 | 2DOG | 12 | 1.94 | 197 |
| O2D12 | D5M2 | 2DOG | 11 | 2.10 | 197 |
| O2D2 | D5M1 | 2DOG | 10 | 1.99 | 197 |
| O2D3 | D5M2 | 2DOG | 12 | 2.11 | 195 |
| O2D4 | D5M2 | 2DOG | 12 | 0.96 | 182 |
| O2D5 | D5M2 | 2DOG | 12 | 2.18 | 197 |
| O2D6 | D5M2 | 2DOG | 12 | nd | 195 |
| O2D7 | D5M2 | 2DOG | 00 | 1.97 | 197 |
| O2D8 | D5M2 | 2DOG | 11 | 2.53 | 182 |
| O2D9 | D5M2 | 2DOG | 12 | 2.11 | 195 |
| O2E1 | D5M2 | 2DOG | 12 | 2.17 | 195 |
| O2E10 | D5M2 | 2DOG | 12 | 2.05 | 195 |
| O2E11 | D5M2 | 2DOG | 00 | 2.01 | 197 |
| O2E12 | D5M2 | 2DOG | 00 | 2.06 | 197 |
| O2E2 | D5M2 | 2DOG | 12 | 1.84 | 195 |
| O2E3 | D5M2 | 2DOG | 00 | 1.94 | 197 |
| O2E4 | D5M2 | 2DOG | 12 | 1.99 | 195 |
| O2E5 | D5M2 | 2DOG | 10 | 2.03 | 197 |
| O2E6 | D5M2 | 2DOG | 10 | 2.03 | 195 |
| O2E7 | D5M2 | 2DOG | 12 | 1.99 | 203 |
| O2E8 | D5M2 | 2DOG | 12 | 1.96 | 197 |
| O2E9 | D5M2 | 2DOG | 11 | 2.10 | 195 |
| O2F1 | D5M2 | 2DOG | 10 | 2.04 | 182 |
| O2F10 | D5M3 | 2DOG | 12 | 2.03 | 197 |
| O2F11 | D5M3 | 2DOG | 00 | 1.97 | 197 |
| O2F12 | D5M3 | 2DOG | 01 | 2.03 | 197 |
| O2F2 | D5M2 | 2DOG | 11 | 2.04 | 195 |
| O2F3 | D5M2 | 2DOG | 11 | 2.11 | 195 |
| O2F4 | D5M2 | 2DOG | 12 | 2.89 | 182 |
| O2F5 | D5M2 | 2DOG | 00 | 1.97 | 197 |
| O2F6 | D5M2 | 2DOG | 10 | 1.97 | 195 |
| O2F7 | D5M3 | 2DOG | 10 | 1.83 | 195 |
| O2F8 | D5M3 | 2DOG | 12 | nd | 195 |
| O2F9 | D5M3 | 2DOG | 12 | 2.05 | 195 |
| O2G1 | D5M3 | 2DOG | 01 | 2.03 | 197 |
| O2G10 | D5M3 | 2DOG | 12 | 2.14 | 195 |
| O2G11 | D5M3 | 2DOG | 12 | 1.98 | 195 |
| O2G12 | D5M3 | 2DOG | 11 | 2.18 | 195 |
| O2G2 | D5M3 | 2DOG | 00 | 1.95 | 197 |
| O2G3 | D5M3 | 2DOG | 02 | 1.96 | 197 |
| O2G4 | D5M3 | 2DOG | 12 | 2.09 | 203 |
| O2G5 | D5M3 | 2DOG | 10 | 1.98 | 197 |
| O2G6 | D5M3 | 2DOG | 10 | 1.98 | 197 |
| O2G7 | D5M3 | 2DOG | 02 | 1.87 | 197 |
| O2G8 | D5M3 | 2DOG | 12 | 2.07 | 195 |
| O2G9 | D5M3 | 2DOG | 00 | 1.96 | 197 |
| O2H1 | D5M3 | 2DOG | 12 | 2.09 | 195 |
| O2H2 | D5M3 | 2DOG | 10 | 1.91 | 203 |
| O2H3 | D5M3 | 2DOG | 12 | 1.96 | 195 |
| O2H4 | D5M3 | 2DOG | 10 | 1.91 | 203 |
| O2H5 | D5M3 | 2DOG | 00 | 2.02 | 197 |
| O2H6 | D5M3 | 2DOG | 00 | 1.95 | 197 |
| O3A1 | D5M3 | 2DOG | 10 | 2.32 | 197 |
| O3A10 | D5M3 | 2DOG | 12 | 2.07 | 197 |
| O3A11 | D5M3 | 2DOG | 11 | 2.09 | 195 |
| O3A12 | D5M3 | 2DOG | 11 | 2.07 | 195 |
| O3A2 | D5M3 | 2DOG | 11 | 2.12 | 195 |
| O3A3 | D5M3 | 2DOG | 12 | 2.07 | 182 |
| O3A4 | D5M3 | 2DOG | 11 | 2.18 | 195 |
| O3A5 | D5M3 | 2DOG | 11 | 2.07 | 195 |
| O3A6 | D5M3 | 2DOG | 11 | 2.27 | 195 |
| O3A7 | D5M3 | 2DOG | 11 | 2.11 | 195 |
| O3A8 | D5M3 | 2DOG | 00 | 2.05 | 195 |
| O3A9 | D5M3 | 2DOG | 12 | 2.17 | 195 |
| O3B1 | D5M3 | 2DOG | 12 | 2.07 | 195 |
| O3B10 | D5M4 | 2DOG | 00 | 2.03 | 197 |
| O3B11 | D5M4 | 2DOG | 00 | 2.02 | 195 |
| O3B12 | D5M4 | 2DOG | 00 | 2.01 | 195 |
| O3B2 | D5M3 | 2DOG | 12 | 2.10 | 195 |
| O3B3 | D5M3 | 2DOG | 10 | 1.02 | 182 |
| O3B4 | D5M3 | 2DOG | 11 | 2.49 | 195 |
| O3B5 | D5M3 | 2DOG | 11 | 2.09 | 195 |
| O3B6 | D5M3 | 2DOG | 12 | 2.14 | 197 |
| O3B7 | D5M4 | 2DOG | 00 | 2.02 | 197 |
| O3B8 | D5M4 | 2DOG | 00 | 2.03 | 197 |
| O3B9 | D5M4 | 2DOG | 11 | 2.11 | 195 |
| O3C1 | D5M4 | 2DOG | 00 | 2.05 | 197 |
| O3C10 | D5M5 | 2DOG | 03 | 2.09 | 195 |
| O3C11 | D5M5 | 2DOG | 12 | 1.02 | 182 |
| O3C12 | D5M5 | 2DOG | 13 | 1.08 | 195 |
| O3C2 | D5M4 | 2DOG | 03 | 2.04 | 197 |
| O3C3 | D5M4 | 2DOG | 00 | 1.96 | 197 |
| O3C4 | D5M4 | 2DOG | 10 | 2.17 | 195 |
| O3C5 | D5M4 | 2DOG | 12 | 2.06 | 197 |
| O3C6 | D5M5 | 2DOG | 10 | 2.04 | 195 |
| O3C7 | D5M5 | 2DOG | 12 | 1.26 | 195 |
| O3C8 | D5M5 | 2DOG | 02 | 2.05 | 195 |
| O3C9 | D5M5 | 2DOG | 11 | 1.16 | 195 |
| O3D1 | D5M5 | 2DOG | 00 | 1.14 | 195 |
| O3D2 | D5M5 | 2DOG | 00 | 2.03 | 197 |
| O3D3 | D5M5 | 2DOG | 11 | nd | 182 |
| O3E5 | D1M2 | YPD | 00 | 2.02 | 195 |
| O3E6 | D1M2 | YPD | 00 | 1.99 | 195 |
| O3E7 | D1M2 | YPD | 00 | 2.02 | 195 |
| O3E8 | D1M2 | YPD | 00 | 2.02 | 195 |
| O3F1 | D1M3 | YPD | 00 | 1.99 | 195 |
| O3F10 | D1M3 | YPD | 00 | 1.90 | 195 |
| O3F2 | D1M3 | YPD | 00 | 2.02 | 195 |
| O3F6 | D1M3 | YPD | 00 | 1.97 | 195 |
| O3F7 | D1M3 | YPD | 00 | 1.98 | 195 |
| O3G1 | D1M5 | YPD | 00 | 1.97 | 195 |
| O3G10 | D2M3 | YPD | 00 | 1.97 | 197 |
| O3G11 | D2M3 | YPD | 00 | 1.95 | 197 |
| O3G12 | D2M3 | YPD | 00 | 1.93 | 197 |
| O3G2 | D1M5 | YPD | 00 | 1.98 | 195 |
| O3G4 | D1M5 | YPD | 00 | 1.96 | 195 |
| O3G5 | D1M5 | YPD | 00 | 1.98 | 182 |
| O3G6 | D2M3 | YPD | 00 | 1.99 | 197 |
| O3G7 | D2M3 | YPD | 00 | 1.99 | 197 |
| O3G8 | D2M3 | YPD | 00 | 1.96 | 197 |
| O3G9 | D2M3 | YPD | 00 | 1.98 | 197 |
| O3H1 | D2M3 | YPD | 00 | 1.98 | 197 |
| O3H10 | D3M1 | YPD | 00 | 1.96 | 197 |
| O3H11 | D3M1 | YPD | 00 | 1.92 | 197 |
| O3H12 | D3M1 | YPD | 00 | 1.96 | 197 |
| O3H2 | D2M3 | YPD | 00 | 2.00 | 197 |
| O3H3 | D2M3 | YPD | 00 | 2.01 | 195 |
| O3H4 | D2M3 | YPD | 00 | 1.99 | 195 |
| O3H5¥ | D2M3 | YPD | 10 | 1.97 | 197 |
| O3H6 | D3M1 | YPD | 00 | 1.98 | 197 |
| O3H7 | D3M1 | YPD | 00 | 1.95 | 197 |
| O3H8 | D3M1 | YPD | 00 | 1.99 | 197 |
| O3H9 | D3M1 | YPD | 00 | 1.93 | 197 |
| O4A1 | D3M1 | YPD | 00 | 1.99 | 195 |
| O4A10 | D3M2 | YPD | 00 | 1.98 | 197 |
| O4A11 | D3M2 | YPD | 00 | 1.98 | 197 |
| O4A12 | D3M2 | YPD | 00 | 2.01 | 197 |
| O4A2 | D3M1 | YPD | 00 | 2.01 | 195 |
| O4A3 | D3M1 | YPD | 00 | 2.01 | 197 |
| O4A4 | D3M1 | YPD | 00 | 1.97 | 195 |
| O4A5 | D3M1 | YPD | 00 | 2.01 | 195 |
| O4A6 | D3M2 | YPD | 00 | 2.01 | 195 |
| O4A7 | D3M2 | YPD | 00 | 2.02 | 195 |
| O4A8 | D3M2 | YPD | 00 | 2.03 | 195 |
| O4A9 | D3M2 | YPD | 00 | 2.00 | 182 |
| O4B1 | D3M2 | YPD | 00 | 1.97 | 197 |
| O4B10 | D3M3 | YPD | 00 | 2.00 | 197 |
| O4B11 | D3M3 | YPD | 00 | 1.99 | 197 |
| O4B12 | D3M3 | YPD | 00 | 1.97 | 197 |
| O4B2 | D3M2 | YPD | 00 | 1.96 | 195 |
| O4B3 | D3M2 | YPD | 00 | 1.98 | 195 |
| O4B4 | D3M2 | YPD | 00 | 2.02 | 197 |
| O4B5 | D3M2 | YPD | 00 | 1.97 | 197 |
| O4B6 | D3M3 | YPD | 00 | 2.01 | 197 |
| O4B7 | D3M3 | YPD | 00 | 1.99 | 182 |
| O4B8 | D3M3 | YPD | 00 | 2.00 | 197 |
| O4B9 | D3M3 | YPD | 00 | 1.95 | 197 |
| O4C1 | D3M3 | YPD | 00 | 2.00 | 195 |
| O4C10 | D3M4 | YPD | 00 | 1.96 | 195 |
| O4C11 | D3M4 | YPD | 00 | 2.00 | 195 |
| O4C12 | D3M4 | YPD | 00 | 1.97 | 197 |
| O4C2 | D3M3 | YPD | 00 | 1.97 | 195 |
| O4C3 | D3M3 | YPD | 00 | 1.97 | 195 |
| O4C4 | D3M3 | YPD | 00 | 2.00 | 197 |
| O4C5 | D3M3 | YPD | 00 | 2.00 | 195 |
| O4C6 | D3M4 | YPD | 00 | 2.00 | 195 |
| O4C7 | D3M4 | YPD | 00 | 1.98 | 195 |
| O4C8 | D3M4 | YPD | 00 | 2.01 | 197 |
| O4C9 | D3M4 | YPD | 00 | 2.00 | 195 |
| O4D1 | D3M4 | YPD | 00 | 1.99 | 197 |
| O4D10 | D3M5 | YPD | 00 | 2.00 | 197 |
| O4D11 | D3M5 | YPD | 00 | 1.95 | 182 |
| O4D12 | D3M5 | YPD | 00 | 2.01 | 195 |
| O4D2 | D3M4 | YPD | 00 | 1.99 | 195 |
| O4D3 | D3M4 | YPD | 00 | 2.01 | 195 |
| O4D4 | D3M4 | YPD | 00 | 1.99 | 197 |
| O4D5 | D3M4 | YPD | 00 | 1.97 | 203 |
| O4D6 | D3M5 | YPD | 00 | 1.95 | 195 |
| O4D7 | D3M5 | YPD | 00 | 1.94 | 195 |
| O4D8 | D3M5 | YPD | 00 | 1.97 | 197 |
| O4D9 | D3M5 | YPD | 00 | 2.00 | 197 |
| O4E1 | D3M5 | YPD | 00 | 1.96 | 195 |
| O4E10 | D5M2 | YPD | 00 | 1.97 | 195 |
| O4E11 | D5M2 | YPD | 00 | 1.98 | 197 |
| O4E12 | D5M2 | YPD | 00 | 1.98 | 195 |
| O4E2 | D3M5 | YPD | 00 | 1.93 | 195 |
| O4E3 | D3M5 | YPD | 00 | 1.98 | 195 |
| O4E4 | D3M5 | YPD | 00 | 2.00 | 197 |
| O4E5 | D3M5 | YPD | 00 | 1.92 | 195 |
| O4E6 | D5M1 | YPD | 00 | 1.98 | 197 |
| O4E7 | D5M1 | YPD | 00 | 1.95 | 197 |
| O4E8 | D5M2 | YPD | 00 | 1.98 | 197 |
| O4E9 | D5M2 | YPD | 00 | 1.95 | 197 |
| O4F1 | D5M2 | YPD | 00 | 1.95 | 195 |
| O4F10 | D5M3 | YPD | 02 | 1.97 | 195 |
| O4F11 | D5M3 | YPD | 00 | 1.97 | 197 |
| O4F12 | D5M3 | YPD | 02 | 2.07 | 195 |
| O4F2 | D5M2 | YPD | 00 | 1.91 | 195 |
| O4F3 | D5M2 | YPD | 00 | 1.96 | 197 |
| O4F4 | D5M2 | YPD | 00 | 1.98 | 197 |
| O4F5 | D5M3 | YPD | 00 | 1.91 | 195 |
| O4F6 | D5M3 | YPD | 00 | 1.91 | 195 |
| O4F7 | D5M3 | YPD | 01 | 1.93 | 195 |
| O4F8 | D5M3 | YPD | 02 | 1.95 | 195 |
| O4F9 | D5M3 | YPD | 02 | 2.05 | 195 |
| O4G1 | D5M3 | YPD | 00 | 1.91 | 195 |
| O4G10 | D5M5 | YPD | 00 | 1.98 | 197 |
| O4G11 | D5M5 | YPD | 00 | 1.97 | 197 |
| O4G12 | D5M5 | YPD | 00 | 1.99 | 197 |
| O4G2 | D5M3 | YPD | 00 | 1.91 | 195 |
| O4G3 | D5M3 | YPD | 00 | 1.99 | 197 |
| O4G4 | D5M3 | YPD | 00 | 1.96 | 197 |
| O4G5 | D5M4 | YPD | 00 | 1.85 | 195 |
| O4G6 | D5M4 | YPD | 00 | 1.87 | 195 |
| O4G7 | D5M4 | YPD | 00 | 2.00 | 182 |
| O4G8 | D5M4 | YPD | 00 | 1.91 | 182 |
| O4G9 | D5M4 | YPD | 00 | 1.90 | 195 |
| O4H1 | D5M5 | YPD | 00 | 1.94 | 197 |
| O4H2 | D5M5 | YPD | 00 | 2.00 | 182 |
| O4H3 | D5M5 | YPD | 00 | 1.94 | 195 |
| O4H4 | D5M5 | YPD | 00 | 2.05 | 197 |
| O4H5 | D5M5 | YPD | 00 | 1.90 | 195 |
| O4H6 | D5M5 | YPD | 00 | 1.93 | 195 |
| O5A1 | D5M5 | YPD | 00 | 1.96 | 197 |
| O5A10 | D3M4 | YPD | 00 | 1.93 | 197 |
| O5A11 | D3M4 | YPD | 00 | 1.92 | 195 |
| O5A12 | D3M4 | YPD | 00 | 1.99 | 197 |
| O5A2 | D5M5 | YPD | 00 | 1.93 | 197 |
| O5A3 | D5M5 | YPD | 00 | 1.96 | 197 |
| O5A4 | D3M4 | YPD | 00 | 1.96 | 197 |
| O5A5 | D3M4 | YPD | 00 | 1.94 | 197 |
| O5A6 | D3M4 | YPD | 00 | 1.98 | 197 |
| O5A7 | D3M4 | YPD | 00 | 1.93 | 197 |
| O5A8 | D3M4 | YPD | 00 | 1.91 | 195 |
| O5A9 | D3M4 | YPD | 00 | 1.89 | 195 |
| O5B1 | D3M4 | YPD | 00 | 1.97 | 197 |
| O5B10 | D5M3 | YPD | 00 | 1.93 | 197 |
| O5B11 | D5M3 | YPD | 00 | 1.93 | 197 |
| O5B12 | D5M3 | YPD | 00 | 1.92 | 195 |
| O5B2 | D3M5 | YPD | 00 | 1.89 | 195 |
| O5B3 | D3M5 | YPD | 00 | 1.89 | 195 |
| O5B4 | D3M5 | YPD | 00 | 1.95 | 182 |
| O5B5 | D3M5 | YPD | 00 | 1.92 | 197 |
| O5B6 | D3M5 | YPD | 00 | 1.92 | 197 |
| O5B7 | D5M2 | YPD | 00 | 1.92 | 197 |
| O5B8 | D5M2 | YPD | 00 | 1.90 | 195 |
| O5B9 | D5M3 | YPD | 00 | 1.99 | 197 |
| O5C1 | D5M3 | YPD | 00 | 1.89 | 195 |
| O5C2 | D5M3 | YPD | 00 | 1.91 | 195 |
| O5C3 | D5M3 | YPD | 00 | 1.95 | 182 |
| O5C4 | D5M3 | YPD | 00 | 1.93 | 195 |
| O5C5 | D5M3 | YPD | 00 | 1.92 | 197 |
| O5C6 | D5M3 | YPD | 00 | 1.89 | 182 |
| O5C7 | D5M3 | YPD | 00 | 1.92 | 195 |
| O5C8 | D5M3 | YPD | 00 | 1.89 | 195 |
| O5C9 | D5M3 | YPD | 00 | 1.91 | 195 |
| O5G1 | D1M1 | 2DOG | 00 | 1.87 | 195 |
| O5G10 | D2M1 | 2DOG | 00 | 1.86 | 197 |
| O5G11 | D2M1 | 2DOG | 00 | 1.96 | 197 |
| O5G12 | D2M3 | 2DOG | 00 | 1.92 | 195 |
| O5G2 | D1M1 | 2DOG | 00 | 1.86 | 195 |
| O5G3 | D1M1 | 2DOG | 00 | 1.87 | 195 |
| O5G4 | D1M1 | 2DOG | 00 | 1.94 | 197 |
| O5G5 | D1M1 | 2DOG | 00 | 1.92 | 197 |
| O5G6 | D1M1 | 2DOG | 00 | 1.92 | 197 |
| O5G7 | D2M1 | 2DOG | 00 | 1.89 | 197 |
| O5G8 | D2M1 | 2DOG | 00 | 1.91 | 195 |
| O5G9 | D2M1 | 2DOG | 10 | 1.81 | 182 |
| O5H1 | D2M3 | 2DOG | 00 | 1.93 | 197 |
| O5H10 | D2M3 | 2DOG | 00 | 1.84 | 195 |
| O5H11 | D2M5 | 2DOG | 00 | 1.91 | 182 |
| O5H12 | D2M5 | 2DOG | 00 | 2.02 | 197 |
| O5H2 | D2M3 | 2DOG | 00 | 1.92 | 197 |
| O5H3 | D2M3 | 2DOG | 00 | 1.88 | 197 |
| O5H4 | D2M3 | 2DOG | 00 | 1.90 | 197 |
| O5H5 | D2M3 | 2DOG | 00 | 1.99 | 197 |
| O5H6 | D2M3 | 2DOG | 00 | 1.87 | 195 |
| O5H7 | D2M3 | 2DOG | 00 | 1.89 | 195 |
| O5H8 | D2M3 | 2DOG | 00 | 1.87 | 195 |
| O5H9 | D2M3 | 2DOG | 00 | 1.87 | 195 |
| O6A1 | D3M1 | 2DOG | 00 | 2.20 | 195 |
| O6A10 | D3M2 | 2DOG | 00 | 2.10 | 197 |
| O6A11 | D3M3 | 2DOG | 00 | 2.11 | 197 |
| O6A12 | D3M3 | 2DOG | 00 | 2.11 | 195 |
| O6A2 | D3M1 | 2DOG | 00 | 2.09 | 195 |
| O6A3 | D3M2 | 2DOG | 20 | 2.11 | 195 |
| O6A4 | D3M2 | 2DOG | 00 | 2.14 | 195 |
| O6A5 | D3M2 | 2DOG | 10 | 2.05 | 182 |
| O6A6 | D3M2 | 2DOG | 00 | 2.15 | 197 |
| O6A7 | D3M2 | 2DOG | 00 | 2.11 | 197 |
| O6A8 | D3M2 | 2DOG | 11 | 2.11 | 197 |
| O6A9 | D3M2 | 2DOG | 00 | 2.15 | 197 |
| O6B1 | D3M3 | 2DOG | 00 | 2.11 | 197 |
| O6B10 | D3M4 | 2DOG | 00 | 2.11 | 195 |
| O6B11 | D3M4 | 2DOG | 00 | 2.09 | 197 |
| O6B12 | D3M4 | 2DOG | 00 | 2.10 | 195 |
| O6B2 | D3M3 | 2DOG | 00 | 2.14 | 197 |
| O6B3 | D3M3 | 2DOG | 00 | 2.14 | 197 |
| O6B4 | D3M3 | 2DOG | 00 | 2.10 | 197 |
| O6B5 | D3M3 | 2DOG | 00 | 2.12 | 197 |
| O6B6 | D3M3 | 2DOG | 00 | 2.15 | 197 |
| O6B7 | D3M3 | 2DOG | 00 | 2.12 | 197 |
| O6B8 | D3M3 | 2DOG | 00 | 2.12 | 197 |
| O6B9 | D3M3 | 2DOG | 00 | 2.15 | 195 |
| O6C1 | D3M4 | 2DOG | 00 | 2.12 | 197 |
| O6C11 | D5M5 | 2DOG | 10 | 2.25 | 197 |
| O6C12 | D5M5 | 2DOG | 00 | 2.13 | 182 |
| O6C2 | D3M5 | 2DOG | 00 | 2.14 | 197 |
| O6C3-LG | D3M5 | 2DOG | 00 | 2.13 | 197 |
| O6C4-LG | D5M1 | 2DOG | 00 | 2.10 | 197 |
| O6C5 | D5M1 | 2DOG | 00 | 2.07 | 182 |
| O6D1 | D5M5 | 2DOG | 00 | 2.09 | 197 |

* haploid and near-haploid

# tetraploid or near-tetraploid

¥ strain from YPD selection that is 2DOGR
